# Supplementary material for: Increasing the peroxidase-like activity of the MIL-100(Fe) nanozyme by encapsulating Keggin-type 12-phosphomolybdate and covering three-dimensional graphene
Source: Royal Society of Chemistry journal article supplement (doi:10.1039/d3an00038a), 2023-01-01
Supplement: d3an00038a1.pdf [file d3an00038a1.pdf]

# Supporting Information

## **Increasing the peroxidase-like activity of MIL-100(Fe) by encapsulating Keggin-typed 12-phosphomolybdate and covering three-dimensional graphene**

Yuhan Ji,<sup>a,b</sup> Yupu Wei,<sup>b</sup> Jinghui Shen,<sup>a</sup> Jinlong Zhuo,<sup>b</sup> Mingqi Xu,<sup>b</sup> Yunliang Wang,<sup>\*a</sup>  
Jingquan Sha<sup>\*a,b</sup>

<sup>a</sup> School of Pharmacy, Jiamusi University, Jiamusi, 154007, P.R. China

<sup>b</sup> School of Engineering, and School of Chemistry, Jining University, Qufu, 273155, P.R. China

\*Corresponding author. E-mail address: shajq2002@126.com

---

## Experiments

### Peroxidase-like activity evaluation

The catalytic reaction was carried out at 45 °C using 100  $\mu\text{L}$  of 0.6  $\text{mg mL}^{-1}$  catalyst (MIL-100(Fe), MIL-100(Fe)@PMo<sub>12</sub>, MIL-100(Fe)@3DGO and MIL-100(Fe)@PMo<sub>12</sub>@3DGO) in 2 mL acetate buffer solution (pH=2) containing 2 ml of 1 mM TMB and 200  $\mu\text{L}$  of 100  $\mu\text{M}$  H<sub>2</sub>O<sub>2</sub> for 6 min. And the oxidized product was evaluated by UV-Vis spectra with wavelength from 350-750 nm. The influence of pH (1.0-4.0), temperature (30-55 °C), time (1-12 min), and catalyst dosage (0.1-0.8  $\text{mg mL}^{-1}$ ) on the catalytic activity were investigated by using the same way as peroxidase-like activity evaluation of MIL-100(Fe)@PMo<sub>12</sub>@3DGO except TMB (0.5 mM). The reaction kinetic was carried out by using 0.6  $\text{mg mL}^{-1}$  catalyst with H<sub>2</sub>O<sub>2</sub> or TMB as substrate at 50 °C in acetate buffer solution (pH=2). Kinetic data were collected by fixing the H<sub>2</sub>O<sub>2</sub> (100  $\mu\text{M}$ ) while varying TMB (0.1, 0.5, 1.0, 1.5, 2.0 mM), and keeping the TMB (0.5 mM) while varying H<sub>2</sub>O<sub>2</sub> (0.1, 0.2, 0.3, 0.4, 0.5 mM).

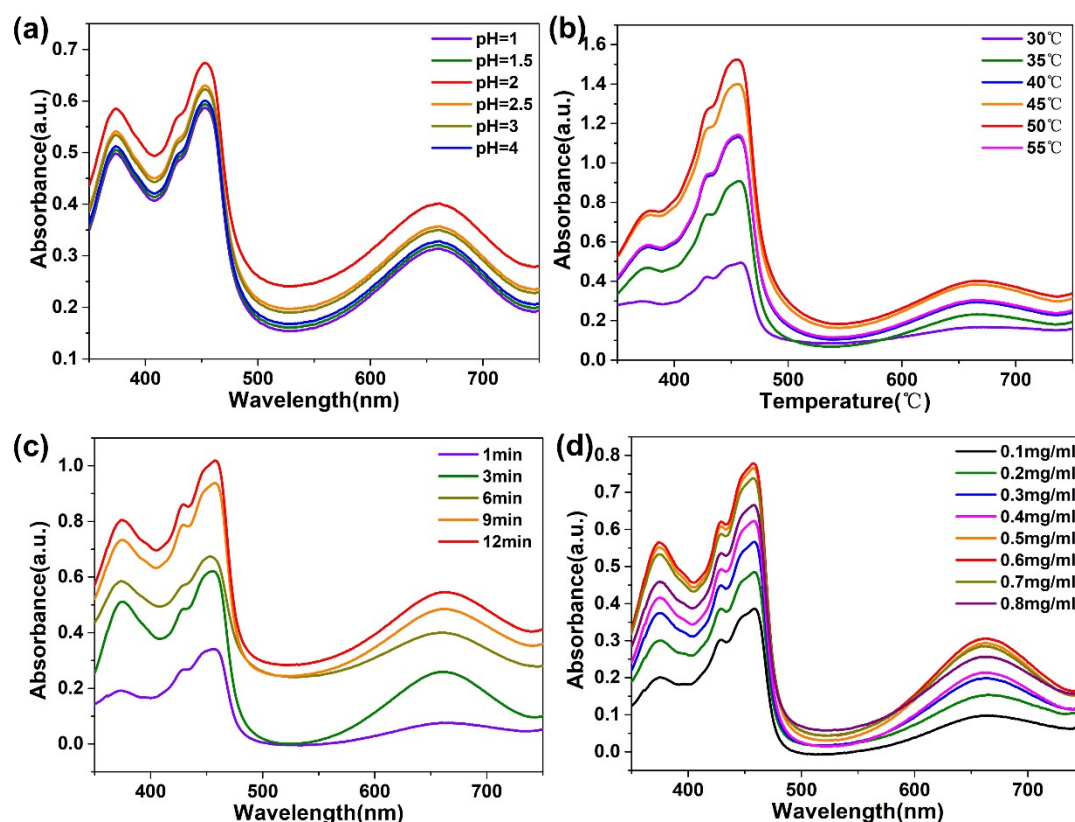

Fig. S1 UV-vis absorbance curves of different (a) reaction pH, (b) reaction temperature, (c) reaction time, (d) MIL-100(Fe)@PMo<sub>12</sub>@3DGO dosage. Reaction conditions: MIL-100(Fe)@PMo<sub>12</sub>@3DGO (0.6  $\text{mg mL}^{-1}$ ), acetate buffer solution (pH=2), H<sub>2</sub>O<sub>2</sub> 100  $\mu\text{M}$ , TMB 0.5 mM at 45 °C for 6 min.

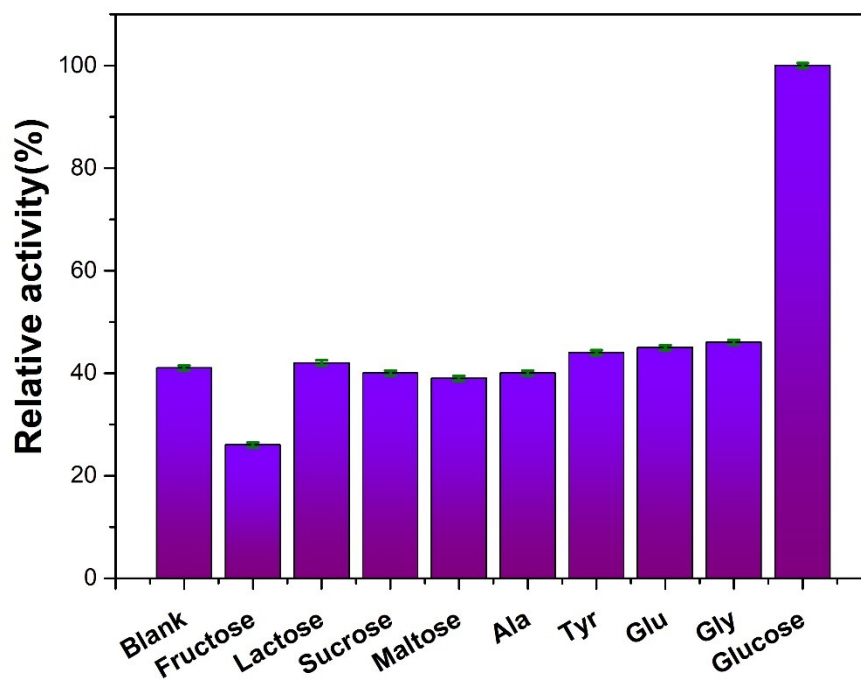

**Fig. S2** Selectivity test of the sensor in the detection of glucose with another biomolecule. The concentrations of MIL-100(Fe)@PMo<sub>12</sub>@3DGO were 0.6 mg mL<sup>-1</sup>, acetate buffer solution (pH=2), H<sub>2</sub>O<sub>2</sub> 100 μM, TMB 1 mM at 45 °C for 6 min.
